# Supplementary material
Source: PubMed Central journal article supplement (PMC7252902)
Supplement: am9b20158_si_001.pdf [file am9b20158_si_001.pdf]

## Supplementary information

### Antimicrobial Electrodeposited Silver-Containing Calcium Phosphate Coatings

T. Mokabber <sup>1</sup>, H. T. Cao <sup>1</sup>, N. Norouzi <sup>2</sup>, P. van Rijn <sup>2\*</sup>, Y. T. Pei <sup>1</sup>

<sup>1</sup> Department of Advanced Production Engineering, Engineering and Technology Institute Groningen, Faculty of Science and Engineering, University of Groningen, Nijenborgh 4, 9747 AG Groningen, The Netherlands.

<sup>2</sup> Department of Biomedical Engineering-FB40, W.J. Kolff Institute for Biomedical Engineering and Materials Science-FB41, University Medical Center Groningen, University of Groningen, A. Deusinglaan 1, 9713 AV Groningen, The Netherlands.

---

\* Corresponding author. Email: p.van.rijn@umcg.nl

**Planktonic bacteria reduction on the Ag/Ca-P coatings:**

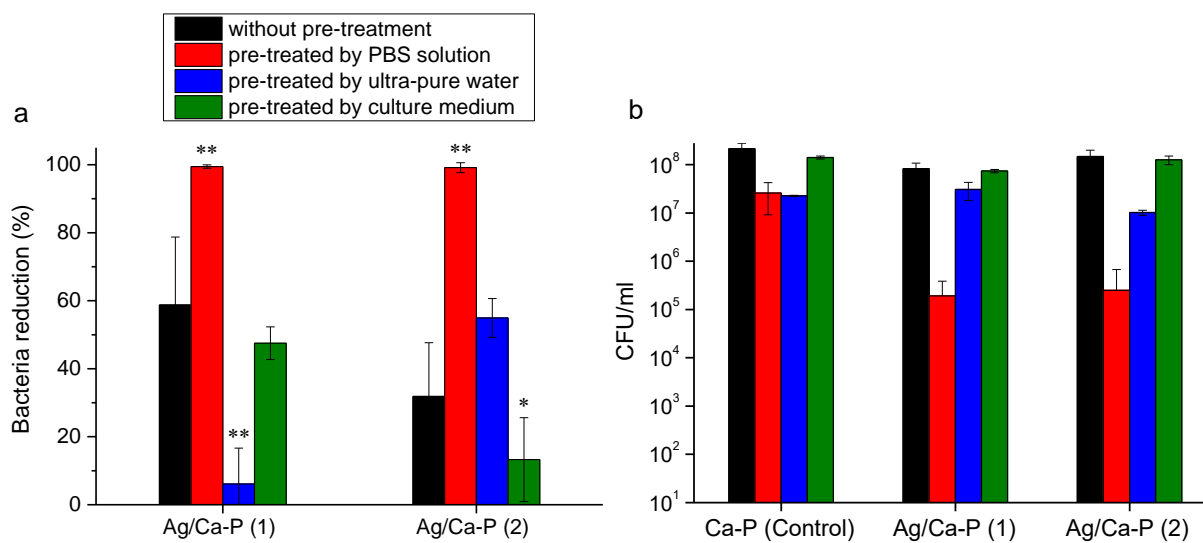

Fig. S11. (a) Percentage of bacteria reduction against *S. aureus*, and (b) number of CFUs within planktonic suspension.

**An image of coated Ti disc:**

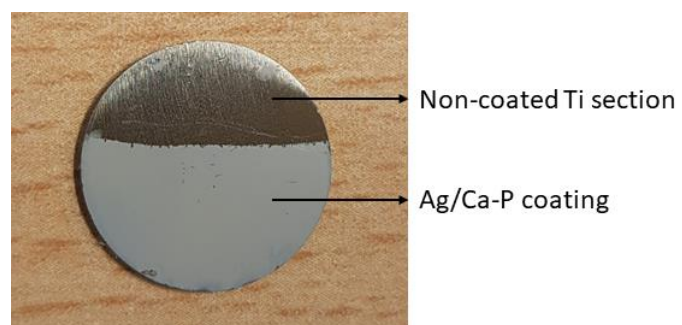

Fig. S12. A titanium disc partially coated with Ag/Ca-P coating.

Fluorescence microscopy images of *S. aureus* on non-coated Ti section of the samples:

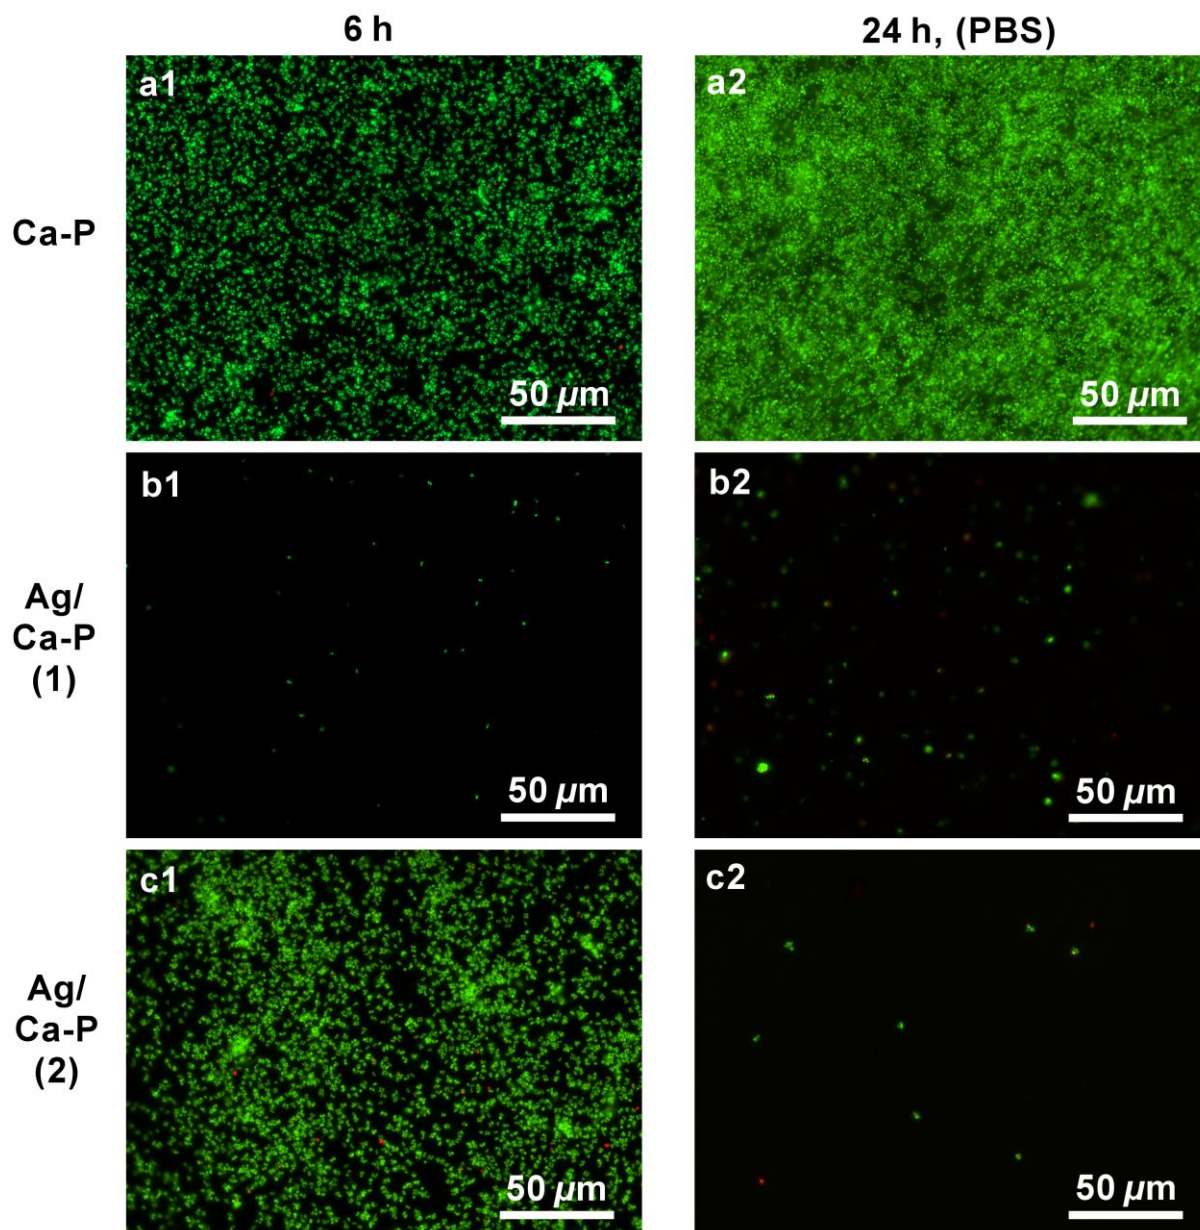

Fig. S13 Fluorescence microscopy images of *S. aureus* on non-coated Ti section of samples in (a) Ca-P coating as control, (b) Ag/Ca-P(1) coating and (c) Ag/Ca-P(2) coating after incubation for (a1 – c1) 6h and (a2 – c2) 24h on coatings pre-treated by PBS. Green and red indicate live and dead bacteria, respectively.

**EDS analysis of the Ag/Ca-P(2) coating after pre-treatment:**

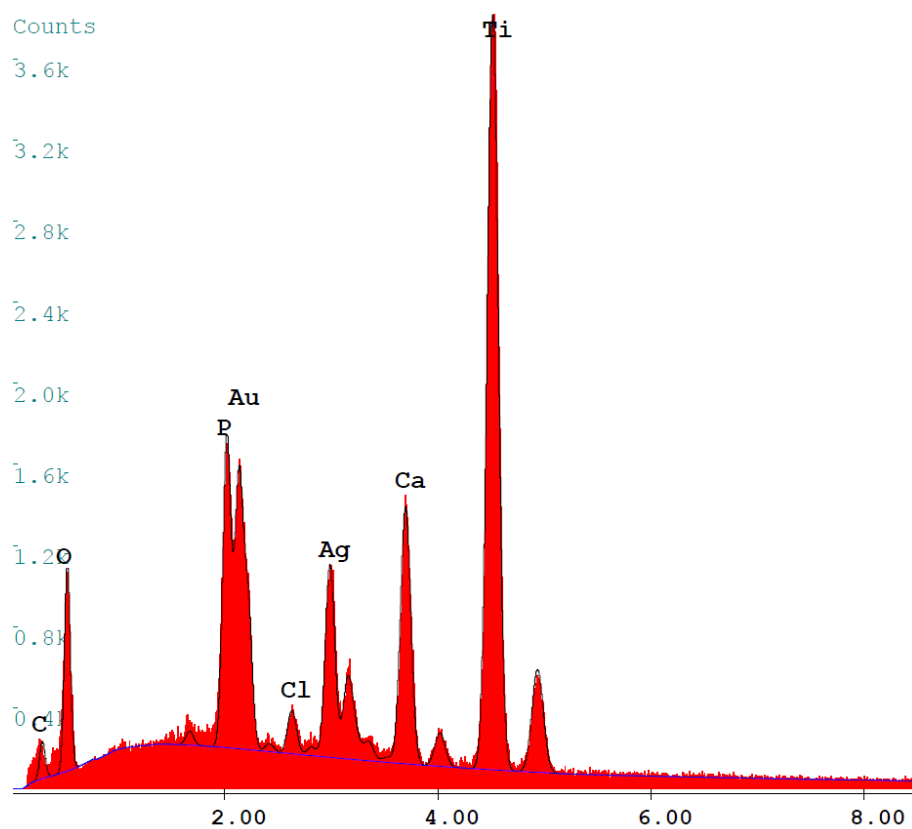

Fig. S14 Energy dispersive x-ray analysis spectra of Ag/Ca-P(2) coating after pre-treatment by PBS solution.
